# Supplementary material for: Enhancing the Stability and Initial Coulombic Efficiency of Silicon Anodes through Coating with Glassy ZIF-4
Source: Nanomaterials (Basel). 2023 Dec 20;14(1):18. doi: 10.3390/nano14010018 (PMC10780738; doi:10.3390/nano14010018)
Supplement: Supplementary file 1 [file nanomaterials-14-00018-s001.zip › nanomaterials-2706413-supplementary.pdf]

## Supporting Information

# Enhancing the Stability and Initial Coulombic Efficiency of Silicon Anodes through Coating with Glassy ZIF-4

In-Hwan Lee <sup>1,†</sup>, Yongsheng Jin <sup>1,†</sup>, Hyeon-Sik Jang <sup>2,\*</sup> and Dongmok Whang <sup>1,\*</sup>

<sup>1</sup> Department of Advanced Materials Science and Engineering, Sungkyunkwan University (SKKU), Suwon 16419, Republic of Korea; koggiree24@skku.edu (I.-H.L.); jinzuyeye@skku.edu (Y.J.)

<sup>2</sup> School of Semiconductor Science & Technology, Jeonbuk National University, Jeonju 54896, Republic of Korea

\* Correspondence: hsjang88@jbnu.ac.kr (H.-S.J.); dwhang@skku.edu (D.W.)

<sup>†</sup> These authors contributed equally to this work.

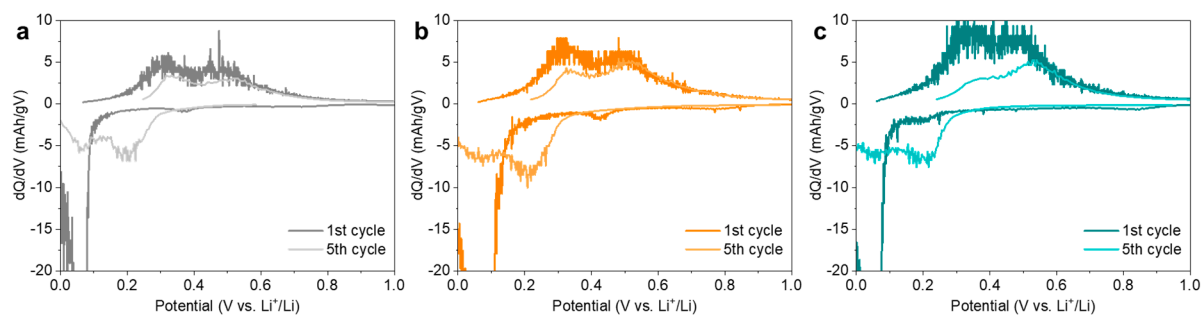

**Figure S1.**  $dQ/dV$  curves of SZ, SZ-4, and SZ-10 electrode obtained from the galvanostatic curves.

**Table S1.** Warburg coefficient and Li-ion chemical diffusion coefficient calculated by EIS methods.

| Electrode | Conditions       | Warburg coefficient ( $\Omega \text{ s}^{0.5}$ ) | Diffusivity ( $\text{cm}^2 \text{ s}^{-1}$ ) |
|-----------|------------------|--------------------------------------------------|----------------------------------------------|
| SZ        | After 1st cycle  | 14.684                                           | 8.14352E-11                                  |
|           | After 50th cycle | 13.755                                           | 9.28082E-11                                  |
| SZ-4      | After 1st cycle  | 23.095                                           | 3.29226E-11                                  |
|           | After 50th cycle | 21.834                                           | 3.6834E-11                                   |
| SZ-10     | After 1st cycle  | 14.815                                           | 8.00045E-11                                  |
|           | After 50th cycle | 21.93                                            | 3.65124E-11                                  |

Diffusivities were calculated from the Warburg element. The formula which is described below was used for calculating diffusivities.

$$D_{Li^+} = \frac{R^2 T^2}{2n_{Li^+}^4 A^2 F^4 C_{Li^+}^2 \sigma_W^2}$$

In this equation,  $R$  represents the gas constant ( $8.314 \text{ J mol}^{-1} \text{ K}^{-1}$ ),  $T$  represents temperature in Kelvin (298.15 K),  $n_{Li^+}$  represents the number of electrons per species reaction (for lithium ions,  $n_{Li^+} = 1$ ),  $A$  represents the surface area of electrode ( $1.54 \text{ cm}^2$ ),  $F$  means Faraday constant ( $96485 \text{ C mol}^{-1}$ ),  $C_{Li^+}$  represents the concentration of lithium ions in  $\text{mol cm}^{-3}$  ( $0.001 \text{ mol cm}^{-3}$ ), respectively.
